# Supplementary material
Source: MDPI journal article supplement (https://www.mdpi.com/2313-0105/9/1/31)
Supplement: s1 [file s1]

Supplementary Materials

# Improving the Structural Ordering and Particle-Size Homogeneity of Li-Rich Layered $\text{Li}_{1.2}\text{Ni}_{0.13}\text{Co}_{0.13}\text{Mn}_{0.54}\text{O}_2$ Cathode Materials through Microwave Irradiation Solid-State Synthesis

Jotti Karunawan <sup>1,2,3</sup>, Oktaviardi Bityasmawan Abdillah <sup>3,4</sup>, Octia Floweri <sup>3,5</sup>, Mahardika Prasetya Aji <sup>6</sup>, Sigit Puji Santosa <sup>7</sup>, Afriyanti Sumboja <sup>3,8</sup> and Ferry Iskandar <sup>2,3,4,7,\*</sup>

<sup>1</sup> Doctoral Program of Nanoscience and Nanotechnology, Graduate School, Institut Teknologi Bandung, Jl. Ganesha 10, Bandung 40132, Indonesia

<sup>2</sup> Research Center of Nanoscience and Nanotechnology, Institut Teknologi Bandung, Jl. Ganesha 10, Bandung 40132, Indonesia

<sup>3</sup> Collaboration Research Center for Advanced Energy Materials, National Research and Innovation Agency–Institut Teknologi Bandung, Jl. Ganesha 10, Bandung 40132, Indonesia

<sup>4</sup> Department of Physics, Faculty of Mathematics and Natural Sciences, Institut Teknologi Bandung, Jl. Ganesha 10, Bandung 40132, Indonesia

<sup>5</sup> Research Center for Advanced Materials, National Research and Innovation Agency (BRIN), Komplek Puspiptek Serpong, South Tangerang 15314, Indonesia

<sup>6</sup> Department of Physics, Universitas Negeri Semarang, Jalan Raya Banaran, Semarang-Central Java 50229, Indonesia

<sup>7</sup> National Centre for Sustainable Transportation Technology (NCSTT), Jl. Ganesha 10, Bandung 40132, Indonesia

<sup>8</sup> Material Science and Engineering Research Group, Faculty of Mechanical and Aerospace Engineering, Institut Teknologi Bandung, Jl. Ganesha 10, Bandung 40132, Indonesia

\* Correspondence: ferry@fi.itb.ac.id

**Citation:** Karunawan, J.; Abdillah, O.B.; Floweri, O.; Aji, M.P.; Santosa, S.P.; Sumboja, A.; Iskandar, F. Improving the Structural Ordering and Particle-Size Homogeneity of Li-Rich Layered

$\text{Li}_{1.2}\text{Ni}_{0.13}\text{Co}_{0.13}\text{Mn}_{0.54}\text{O}_2$  Cathode Materials through Microwave Irradiation Solid-State Synthesis. *Batteries* **2023**, *9*, 31. <https://doi.org/10.3390/batteries9010031>

Academic Editor: Biao Li

Received: 1 December 2022

Revised: 27 December 2022

Accepted: 28 December 2022

Published: 31 December 2022

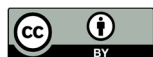

**Copyright:** © 2022 by the authors. Licensee MDPI, Basel, Switzerland. This article is an open access article distributed under the terms and conditions of the Creative Commons Attribution (CC BY) license (<https://creativecommons.org/licenses/by/4.0/>).

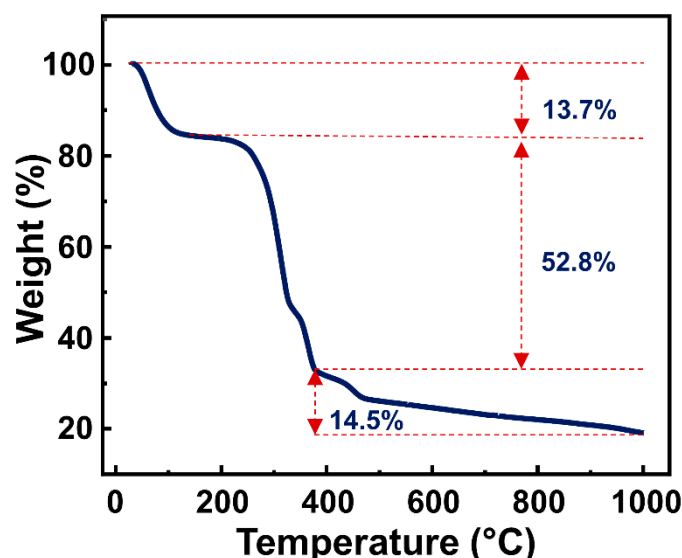

**Figure S1.** TG curve of the precursor of the LNCM sample.

The TG measurement of the precursor mixture was conducted in the range of 30 – 1000 °C. In the first stage, in the range of 30 – 100 °C, 13.7%

weight loss is related to the removal of adsorbed water in the precursor. In the temperature range of 300 – 395 °C, the weight loss of around 52.8% corresponds to the decomposition of organic components (i.e., acetate) [57]. The process is completed around 400 °C. The third stage of the weight loss (14.5%) at 395 – 1000 °C corresponds to the decomposition of

**Table S1.** Comparison of Structural ordering with the other works.

| No. | Synthesis method / strategy                           | Type of Li-rich cathode                                                                         | Intensity ratio<br>$I_{(003)}/I_{(104)}$ | R factor | Reference        |
|-----|-------------------------------------------------------|-------------------------------------------------------------------------------------------------|------------------------------------------|----------|------------------|
| 1.  | Ultrasonic/microwave-assisted co-precipitation method | $\text{Li}_{1.1}\text{Ni}_{0.233}\text{Co}_{0.233}\text{Mn}_{0.433}\text{O}_2$                  | 1.538                                    | -        | [28]             |
| 2.  | Microwave-assisted hydrothermal method                | $x\text{Li}_2\text{MnO}_3 \cdot (1-x)\text{LiNi}_{1/3}\text{Co}_{1/3}\text{Mn}_{1/3}\text{O}_2$ | 1.270                                    | -        | [29]             |
| 3.  | Microwave hydrothermal method                         | $\text{Li}_{1.2}\text{Ni}_{0.16}\text{Co}_{0.08}\text{Mn}_{0.56}\text{O}_2$                     | 1.454                                    | 0.2561   | [30]             |
| 4.  | Coprecipitation / Fe and $\text{PO}_4^{3-}$ co-doped  | $\text{Li}_{1.2}\text{Mn}_{0.56}\text{Ni}_{0.16}\text{Co}_{0.08}\text{O}_2$                     | 1.400                                    | -        | [59]             |
| 5.  | Coprecipitation / S doped                             | $\text{Li}_{1.2}\text{Ni}_{0.2}\text{Mn}_{0.6}\text{O}_2$                                       | 1.320                                    | -        | [60]             |
| 6.  | Sol-gel / Mg-Al codoped                               | $\text{Li}_{1.2}\text{Ni}_{0.13}\text{Co}_{0.13}\text{Mn}_{0.54}\text{O}_2$                     | 1.330                                    | -        | [61]             |
| 7.  | Solid-state/ C coated                                 | $\text{Li}_{1.15}(\text{Ni}_{0.23}\text{Co}_{0.08}\text{Mn}_{0.54})\text{O}_2$                  | 1.580                                    | 0.3000   | [62]             |
| 8.  | Coprecipitation / $\text{LaNiO}_3$ coating            | $\text{Li}_{1.2}\text{Ni}_{0.13}\text{Co}_{0.13}\text{Mn}_{0.54}\text{O}_2$                     | 1.370                                    | 0.3000   | [63]             |
| 9.  | Microwave-assisted solid-state method                 | $\text{Li}_{1.2}\text{Ni}_{0.13}\text{Co}_{0.13}\text{Mn}_{0.54}\text{O}_2$                     | 2.010                                    | 0.4011   | <b>This work</b> |

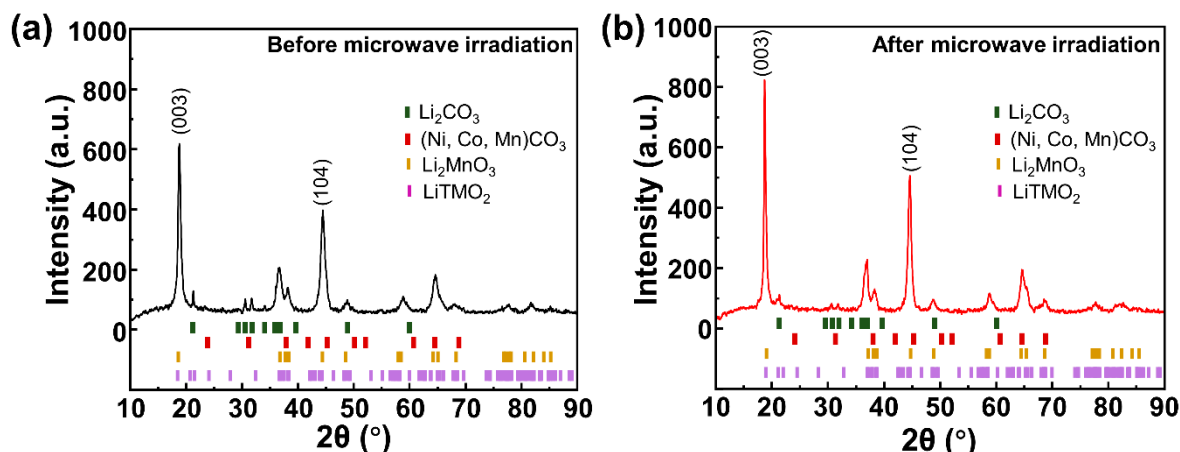

**Figure S2.** XRD patterns of LNCM sampel after the first calcination step, (a) before microwave treatment and (b) after microwave treatment for 20 minutes.

**Table S2.** Full-width at half maximum (FWHM) of the typical XRD diffraction peak of LNCM sample after the first calcination step, before and after microwave treatment for 20 minutes.

| Sample                     | FWHM   |        |
|----------------------------|--------|--------|
|                            | (003)  | (104)  |
| Before microwave treatment | 0.643° | 0.902° |
| After microwave treatment  | 0.365° | 0.713° |

The microwave irradiation treatment affects to the structure of the LNCM samples. Figure S2 shows the amorphous oxide of both samples. The microwave treatment can reduce the containing of  $\text{Li}_2\text{CO}_3$  and  $(\text{Ni}, \text{Co}, \text{Mn})\text{CO}_3$  that is showed by the clear reduction peak of  $\text{Li}_2\text{CO}_3$  and  $(\text{Ni}, \text{Co}, \text{Mn})\text{CO}_3$  after the treatment. The decomposition of  $\text{Li}_2\text{CO}_3$  and  $(\text{Ni}, \text{Co}, \text{Mn})\text{CO}_3$  products probably increases the formation  $\text{Li}_{1.2}\text{Ni}_{0.13}\text{Co}_{0.13}\text{Mn}_{0.54}\text{O}_2$  (LNCM) after microwave irradiation as indicated by the increasing the intesity of dominant peaks and crystallinity (showed by the narrowing of FWHM, as shown in Table S2) [64]. Furthermore,

microwave irradiation treatment potentially increase the cation ordering of  $\text{Li}^+/\text{Ni}^{2+}$  indicated by the increasing of intensity ratio of  $I_{(003)}/I_{(104)}$  (intensity ratio of  $I_{(003)}/I_{(104)}$  before and after microwave treatment = 1.515 and 1.563, respectively), as shown by the Figure S2.

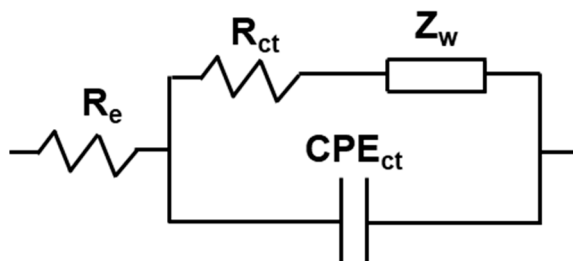

**Figure S3.** Basic equivalent circuit used to model the EIS results.

**Table S3.** Electrochemical impedance spectroscopy (EIS) fitting results of LNCM cathode materials.

| No. | Sample        | $R_s$ ( $\Omega$ ) | $R_{ct}$ ( $\Omega$ ) |
|-----|---------------|--------------------|-----------------------|
| 1.  | w/o microwave | 3.27               | 234.89                |
| 2.  | 10 minutes    | 3.56               | 218.24                |
| 3.  | 20 minutes    | 3.89               | 186.57                |
| 4.  | 30 minutes    | 3.13               | 275.44                |

**Table S4.** Comparison of electrochemical performance with the other works.

| No. | Synthesis method                                      | Type of Li-rich cathode                                                                         | Discharge capacity (Current density) | Capacity retention | Reference        |
|-----|-------------------------------------------------------|-------------------------------------------------------------------------------------------------|--------------------------------------|--------------------|------------------|
| 1.  | Ultrasonic/microwave-assisted co-precipitation method | $\text{Li}_{1.1}\text{Ni}_{0.233}\text{Co}_{0.233}\text{Mn}_{0.433}\text{O}_2$                  | 260 mAh/g (0.1 C)                    | 79.61% 50 cycles   | [28]             |
| 2.  | Microwave-assisted hydrothermal method                | $x\text{Li}_2\text{MnO}_3 \cdot (1-x)\text{LiNi}_{1/3}\text{Co}_{1/3}\text{Mn}_{1/3}\text{O}_2$ | 325 mAh/g (0.1 C)                    | 72.2% 50 cycles    | [29]             |
| 3.  | Microwave hydrothermal method                         | $\text{Li}_{1.2}\text{Ni}_{0.16}\text{Co}_{0.08}\text{Mn}_{0.56}\text{O}_2$                     | 159.3 mAh/g (2000 mA/g)              | 88.6% 300 cycles   | [30]             |
| 4.  | Coprecipitation and Microwave pre-activation          | $\text{Li}(\text{Li}_{0.21}\text{Ni}_{0.131}\text{Co}_{0.122}\text{Mn}_{0.538})\text{O}_2$      | 268.6 mAh/g (25 mA/g)                | 81.1% 200 cycles   | [65]             |
| 5.  | Sol-gel                                               | $\text{Li}_{1.2}\text{Ni}_{0.13}\text{Co}_{0.13}\text{Mn}_{0.54}\text{O}_2$                     | 245 mAh/g (20 mA/g)                  | 68.9 % 100 cycles  | [66]             |
| 6.  | Microwave-assisted solid-state method                 | $\text{Li}_{1.2}\text{Ni}_{0.13}\text{Co}_{0.13}\text{Mn}_{0.54}\text{O}_2$                     | 259.84 mAh/g (20 mA/g)               | 80.57% 200 cycles  | <b>This work</b> |
